# Supplementary material
Source: PubMed Central journal article supplement (PMC4116665)
Supplement: NIHMS603046-supplement-Supp_Materials.pdf [file NIHMS603046-supplement-Supp_Materials.pdf]

## Supplementary Materials for

### **Vaccine-Induced Env V1-V2 IgG3 Correlates with Lower HIV-1 Infection Risk and Declines Soon After Vaccination**

Nicole L. Yates, Hua-Xin Liao, Youyi Fong, Allan deCamp, Nathan A. Vandergrift, William T. Williams, S. Munir Alam, Guido Ferrari, Zhi-yong Yang, Kelly E. Seaton, Phillip W. Berman, Michael D. Alpert, David T. Evans, Robert J. O'Connell, Donald Francis, Faruk Sinangil, Carter Lee, Sorachai Nitayaphan, Supachai Rerks-Ngarm, Jaranit Kaewkungwal, Punnee Pitisuttithum, James Tartaglia, Abraham Pinter, Susan Zolla-Pazner, Peter B. Gilbert, Gary J. Nabel, Nelson L. Michael, Jerome H. Kim, David C. Montefiori, Barton F. Haynes, Georgia D. Tomaras\*

\*Corresponding author. E-mail: gdt@duke.edu

Published 19 March 2014, *Sci. Transl. Med.* **6**, 228ra39 (2014)  
DOI: 10.1126/scitranslmed.3007730

#### **The PDF file includes:**

Fig. S1. Significant correlation of Env IgG3 and V1-V2 with ADCC in RV144, but not VAX003.

Fig. S2. Lack of direct correlations for all HIV-1 Env IgG1 and IgG3 antibody responses.

Fig. S3. Weak association between V1-V2 IgG and V1-V2 IgG3 measurements.

Fig. S4. Cumulative incidence plots of IgG3 to V1-V2 antigens in an RV144 case-control analysis.

Fig. S5. Vaccination scheme for RV144 (top) and VAX003 (bottom) vaccine regimens.

Table S1. ORs for HIV-1 infection risk in univariate analyses of IgG3 measurements.

Table S2. HIV-1 Env IgG4 response rates in RV144 vaccinees do not decline between peak immunogenicity (week 26) and week 52.

## Fig. S1

A.

RV144

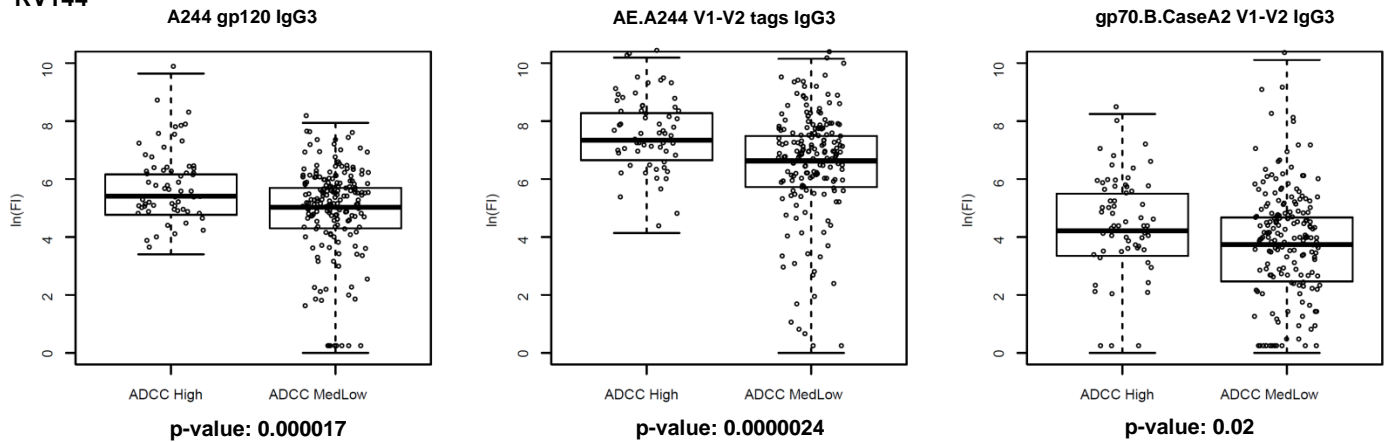

B.

VAX003

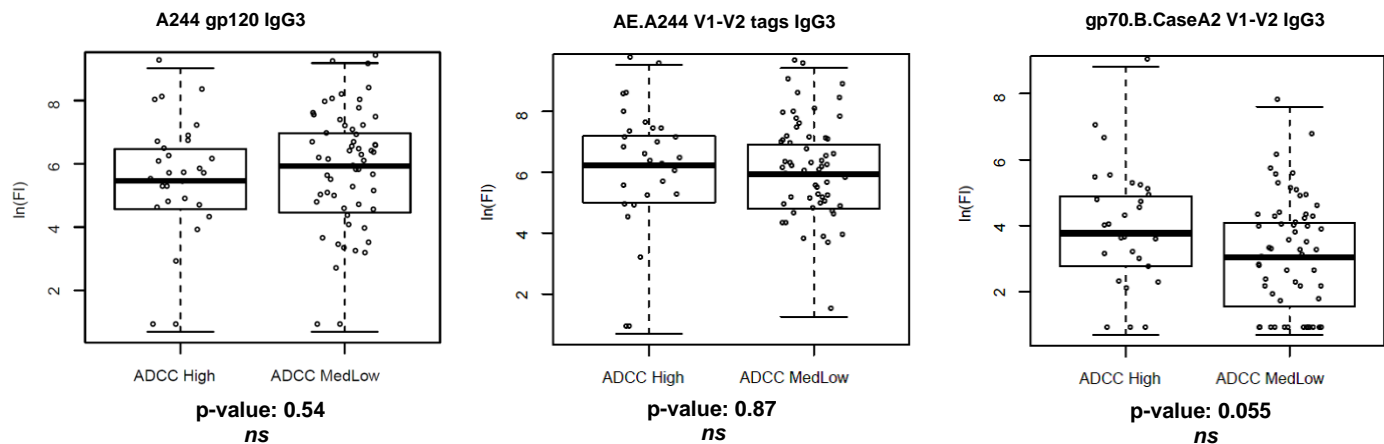**Fig. S1. Significant correlation of Env IgG3 and V1-V2 with ADCC in RV144, but not VAX003.**

IgG3 responses to A244 gp120, AE.A244 V1-V2 tags, and gp70.B.CaseA2 V1-V2 are shown for RV144 (N=>200) (A) and VAX003 (N=87) (B). The RV144 data are representative of tests with 9 antigens (3 different envelopes and 6 V1/V2 antigens) that all showed significant correlations with ADCC. The VAX003 data are representative of tests with 11 antigens (7 different envelopes and 4 V1/V2 antigens). All tests for the VAX003 comparison were not significant (*ns*) for any antigen. Only one showed a trend (gp70.B.CaseA2 V1-V2: P-value 0.055). All p-values for the RV144 comparison were significant (p-values: 0.03 to <0.00001). The p-values are t-test, respectively (Wilcoxon rank tests gave the same significance result).

**Fig. S2**

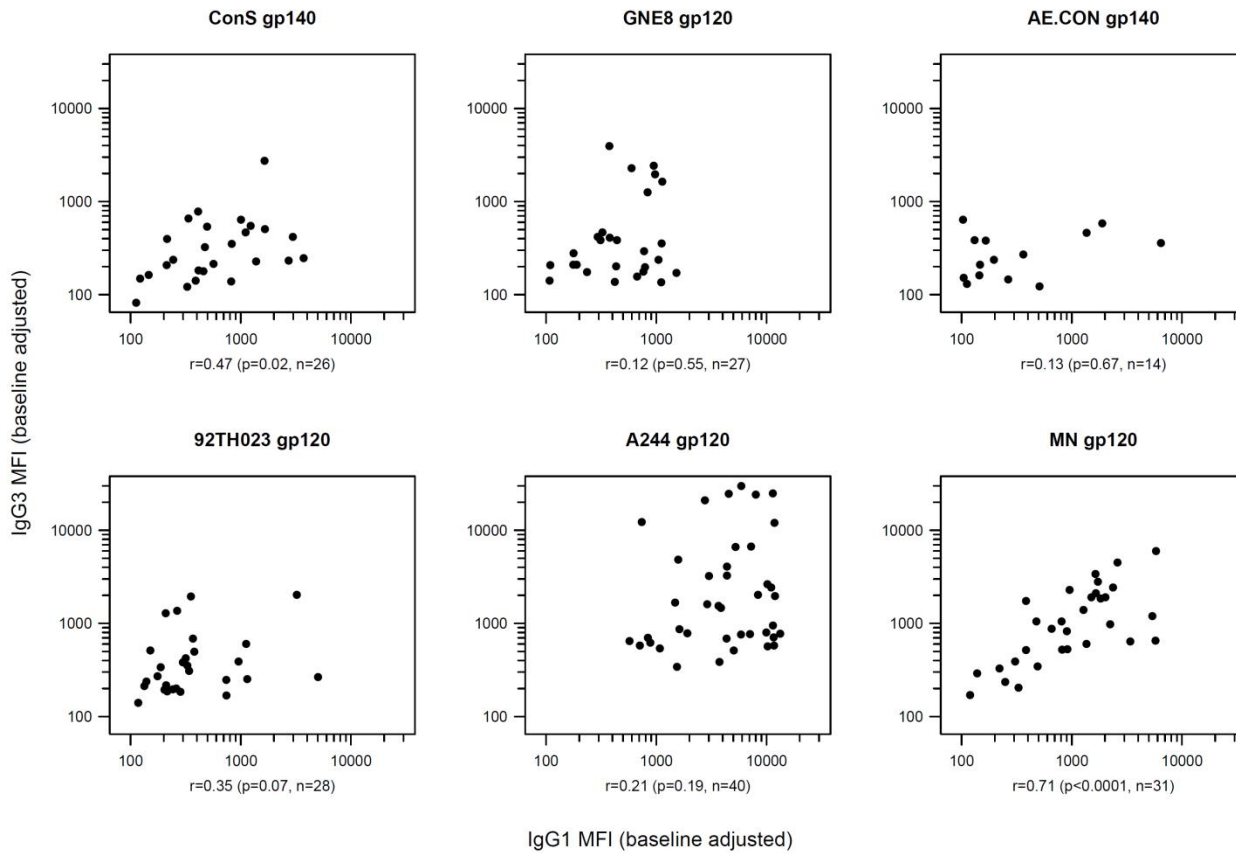

**Fig. S2. Lack of direct correlations for all HIV-1 Env IgG1 and IgG3 antibody responses.** Env specific IgG and IgG3 responses from RV144 were measured for six HIV-1 envelope antigens: the vaccine boost envelopes (A244 gp120, MN gp120), the vaccine prime envelope gp120 ( 92TH023 gp120), a clade B gp120 (GNE8 gp120), a group M consensus envelope (ConSgp140) and a clade AE consensus (representing clades circulating in Thailand). Correlation coefficients ( $r$ ) range from 0.12 to 0.71 (Spearman rank).

**Fig. S3**

**A.**

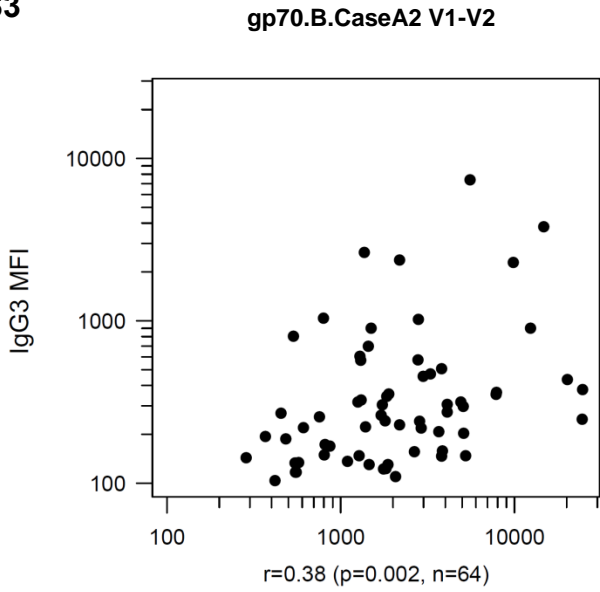

**B.**

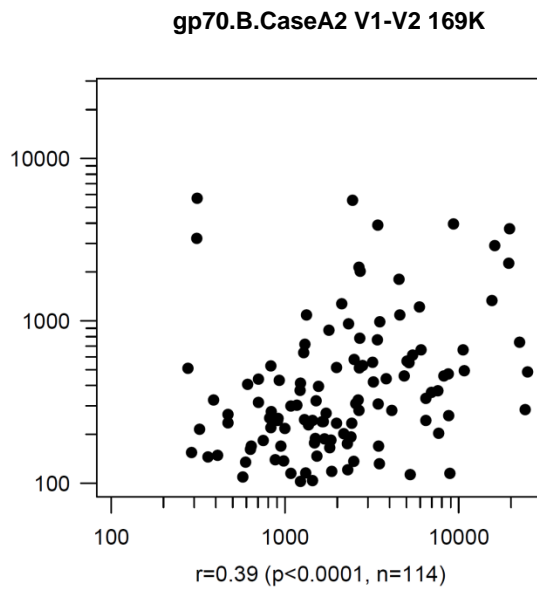

IgG MFI

**Fig. S3. Weak association between V1-V2 IgG and V1-V2 IgG3 measurements.** IgG and IgG3 responses from RV144 are shown for gp70.B.CaseA2 V1-V2 (A) and for gp70.B.CaseA2 V1-V2 169K in panel (B). Correlation coefficients ( $r$ ) = 0.38 and 0.39, respectively (Spearman rank).

**Fig. S4**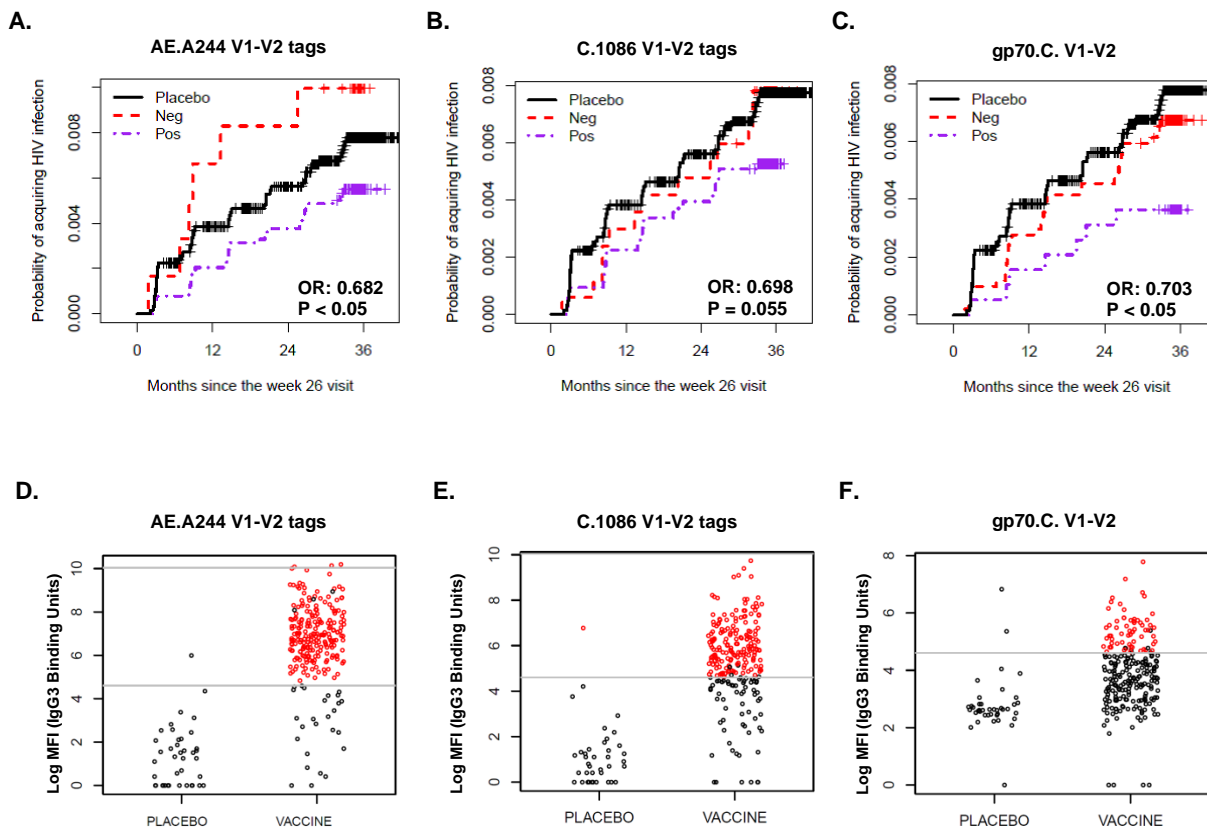

**Fig S4. Cumulative Incidence Plots of IgG3 to V1-V2 Antigens in an RV144 Case-Control Analysis.** The magnitude of the IgG3 response to three different V1V2 antigens corresponded to a decreased infection risk (IgA Adjusted) (Odds ratio of less than 1) and two of these responses significantly correlated with decreased infection risk (<0.05, logisitic regression). In addition to the clade B V1V2 antigen shown in Figure 3 that significantly correlated with risk of infection, we show here that IgG3 responses to the V1-V2 of subtype AE and C also correlates with reduced risk thus indicating breadth of IgG3 V1V2 responses were induced by RV144. These data also enable direct comparison of antibody responses to clade C efficacy trials including HVTN 505 and planned South African trials. **(A)** Subtype AE.A244 V1-V2 Tags (Subtype of circulating strains in Thailand and same antigen in the RV144 immunogen), **(B)** Subtype C 1086 V1-V2 Tags (Same Clade C antigen in planned HIV-1 efficacy trials) and **(C)** subtype C gp70V1V2 ( C.97ZA012) (same Clade C antigen in the HVTN 505 VRC vaccine regimen). **D-F.** Magnitude of IgG3 responses to V1/V2 Antigens in an RV144 case control analysis in placebos vs. vaccinees are shown for each antigen as log MFI binding units.

**Fig. S5**

**A.**

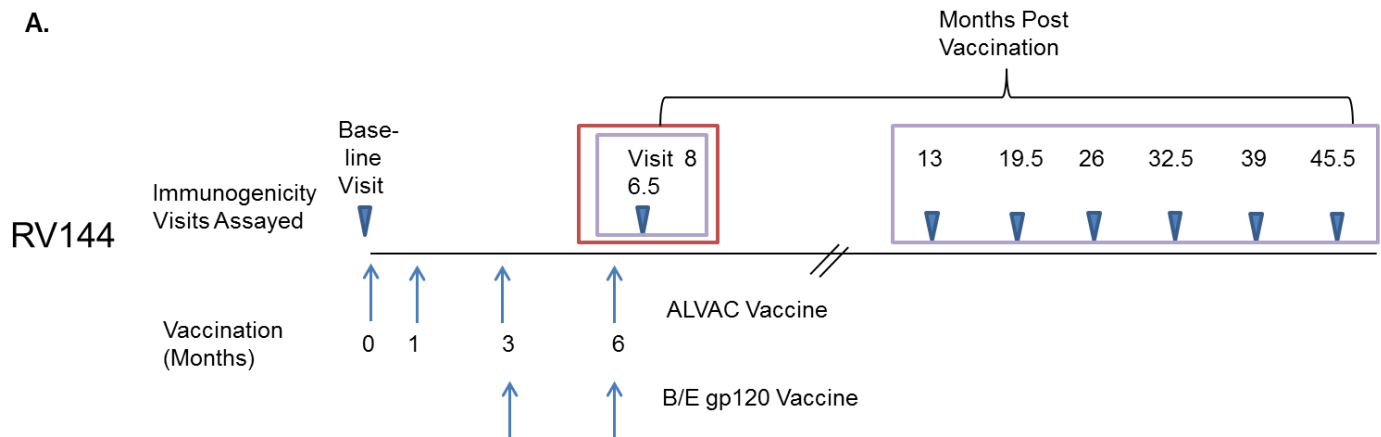

**B.**

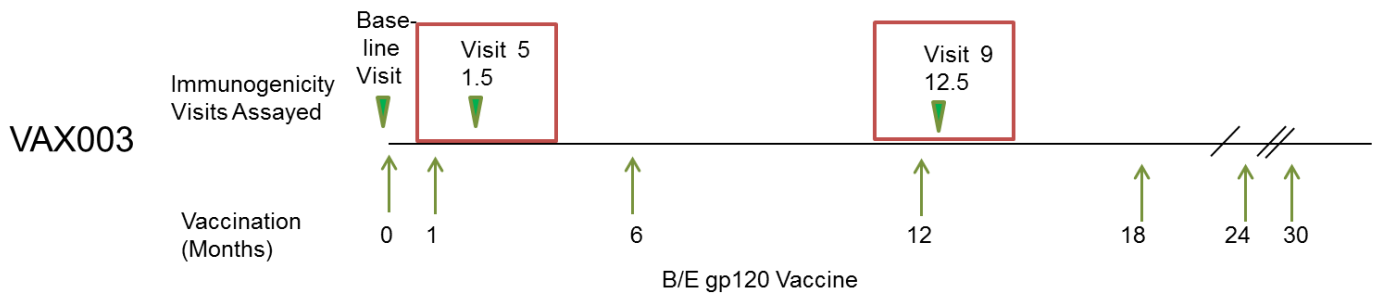

**Fig S5. Vaccination scheme for RV144 (top) and VAX003 (bottom) vaccine regimens.** Blue or green arrows indicate the times of vaccination. The inverted triangles indicate the sampling time points. Red boxes are around the immunogenicity visits examined in the RV144/VAX003 comparison study and lavender boxes are around the immunogenicity visits examined in the RV144 longitudinal follow-up study.

**Table S1****Correlation of IgG3 Response Rate With Risk of Infection - RV144 Case Control**

| Type of Env Protein                                         | HIV-1 V1V2 Antigen       | Response Rate |              |          |              | Response Magnitude |       |          |              |
|-------------------------------------------------------------|--------------------------|---------------|--------------|----------|--------------|--------------------|-------|----------|--------------|
|                                                             |                          | Univariate    |              | IgA adj. |              | Univariate         |       | IgA adj. |              |
|                                                             |                          | OR            | p-val        | OR       | p-val        | OR                 | p-val | OR       | p-val        |
| V1V2 from RV144 vaccine boost (A244 gp120)                  | AE.A244 V1-V2 tags       | 0.494         | 0.162        | 0.391    | 0.075        | 0.791              | 0.185 | 0.682    | <b>0.045</b> |
| V1V2 from Clade C                                           | C.1086 V1-V2 tags        | 0.564         | 0.142        | 0.511    | 0.093        | 0.785              | 0.168 | 0.698    | 0.055        |
| V1V2 scaffold utilized in <sup>2</sup> with mutation (169K) | gp70.B.CaseA2 V1-V2 169K | 0.354         | <b>0.006</b> | 0.317    | <b>0.003</b> | 0.804              | 0.208 | 0.744    | 0.095        |
| V1V2 from VRC Clade A gp120                                 | Gp70 V1-V2 A             | 0.424         | 0.129        | 0.379    | 0.091        | 0.919              | 0.630 | 0.839    | 0.343        |
| V1V2 scaffold utilized in <sup>2</sup>                      | Gp70 V1-V2 CaseA2        | 0.531         | 0.191        | 0.476    | 0.130        | 0.749              | 0.088 | 0.689    | <b>0.034</b> |
| V1V2 from Clade C gp120                                     | gp70.C. V1-V2            | 0.493         | 0.121        | 0.446    | 0.081        | 0.753              | 0.104 | 0.703    | <b>0.049</b> |

**Table S1. ORs for HIV-1 infection risk in univariate analyses of IgG3 measurements.** IgG3 responses were measured in the plasma of 246 case control subjects and examined for correlation of HIV-1 risk. In the IgA adjusted model, IgA score is added to the model as a continuous variable. Significant p-values are shown in bold.

**Table S2**

| Response Rates of IgG4 Binding Antibodies – RV144 |                  |                   |         |
|---------------------------------------------------|------------------|-------------------|---------|
| Type of Env Protein                               | Envelope Antigen | Response Rate (%) |         |
|                                                   |                  | Week 26           | Week 52 |
| RV144 Vaccine Boost ( monomer form)               | A244 gp120       | 11                | 21      |
| RV144 Vaccine Boost                               | MN gp120         | 11                | 16      |
| Clade B                                           | GNE8 gp120       | 8                 | 34      |

**Table S2. HIV-1 Env IgG4 response rates in RV144 vaccinees do not decline between peak immunogenicity (week 26) and week 52.** Binding antibody levels were determined and the percent responders for each antigen at each time point post vaccination are shown.
